# Supplementary material for: Does the choice of intraoperative fluid modify abdominal aneurysm repair outcomes? A cohort analysis
Source: PubMed Central journal article supplement — Medicine (Baltimore). 2019 Jul 12;98(28):e16387. doi: 10.1097/MD.0000000000016387 (PMC6641776; doi:10.1097/md.0000000000016387), 2019-07-12
Supplement: medi-98-e16387-s001.pdf [file medi-98-e16387-s001.pdf]

**Supplemental table.** Vasoactive medication during surgery and laboratory values at end of surgery

|               | All (n=1095)     | RIFLE n (n=953)    | RIFLE R (n=65)    | RIFLE I (n=42)    | RIFLE F (n=35)     |
|---------------|------------------|--------------------|-------------------|-------------------|--------------------|
| Catecholamine | 20 (2%)          | 14 (1%)            | 2 (3%)            | 2 (5%)            | 2 (6%)             |
| Vasopressor   | 505 (46%)        | 418 (44%)          | 45 (69%)          | 23 (55%)          | 19 (54%)           |
| Vasodilatator | 43 (4%)          | 33 (3%)            | 7 (11%)           | 2 (5%)            | 1 (3%)             |
| BE            | -3.4 (-5.3--1.2) | -3.1 (-4.7--1)     | -5 (-6.95--2.65)  | -5.05 (-10--3.17) | -6.3 (-8.75--4.98) |
| Lact          | 1.9 (1.3-2.9)    | 1.8 (1.2-2.5)      | 2.4 (1.7-4.1)     | 3.8 (2.7-5.1)     | 3.6 (2.6-4.5)      |
| Gluc          | 130 (110-151)    | 126.5 (109-147.25) | 149.5 (126.5-179) | 150 (125-180)     | 145 (129.5-174.75) |
| Hb            | 99 (86-111)      | 100 (88-112.2)     | 93 (80.8-100.3)   | 82 (77.5-95)      | 90.5 (82-103.2)    |

BE, base excess of blood [mmol/L]; Lact, blood lactate concentration [mmol/L]; Gluc, blood glucose levels [mg/dL]; Hb, Hemoglobin values [g/L].

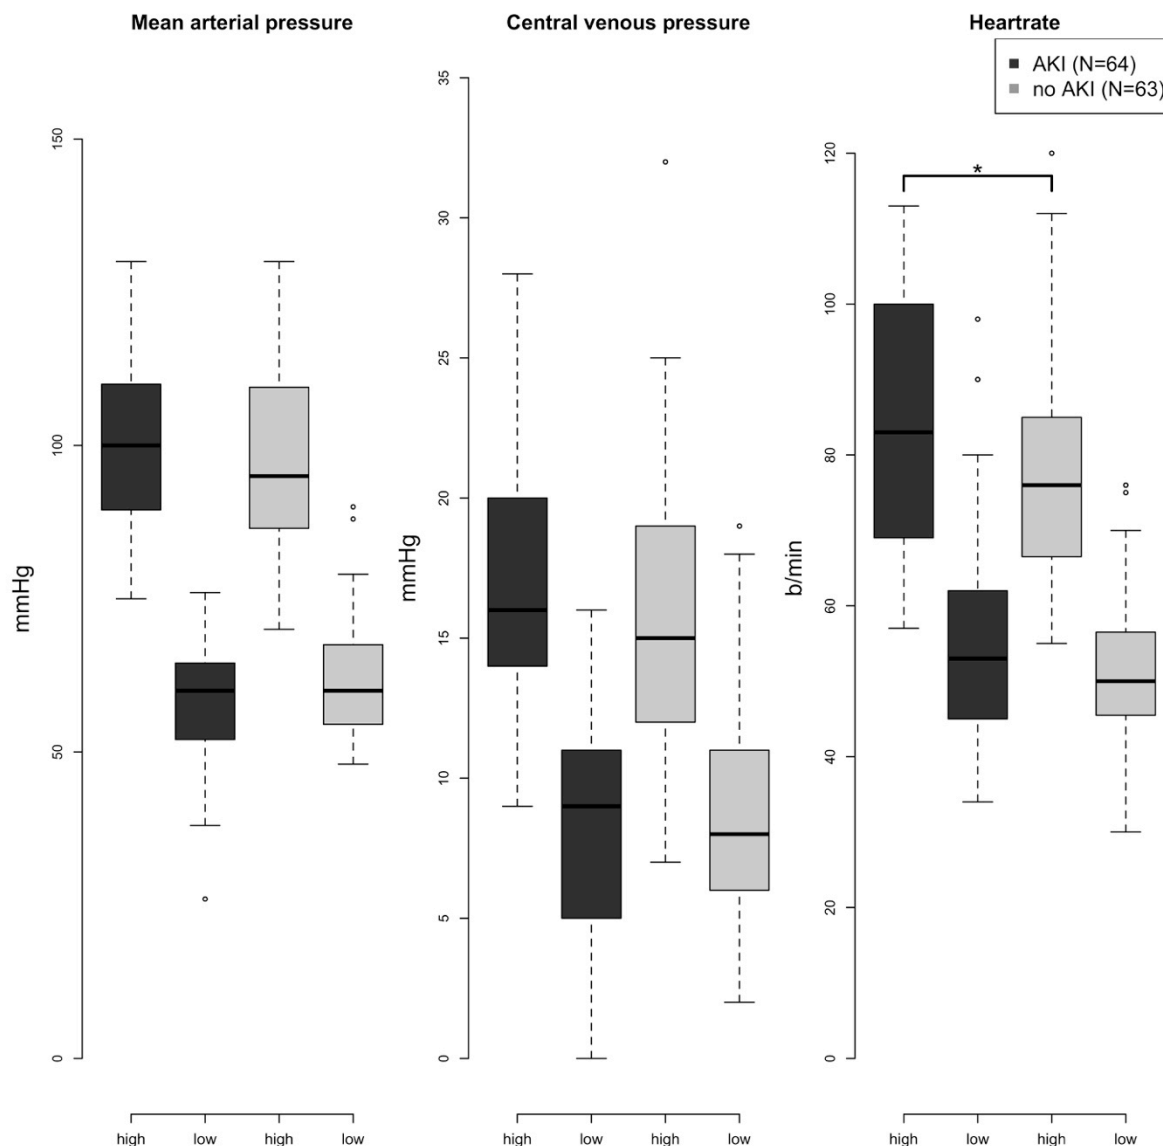

### Supplemental figure

Highest and lowest values of mean arterial pressure, central venous pressure and heart rate of 127 randomly selected patients. This plot reflects „extremes“ in hemodynamic parameters comparing patients with or without AKI. It illustrates our institutional practice in hemodynamic management and shows that even the highest median MAP was 98 mmHg (IQR, 88 – 110 mmHg), the highest median CVP was 16 mmHg (IQR, 13 – 20 mmHg) and the highest median heart rate was 78 b/min (IQR, 68 – 92 b/min). Also, the lowest values for MAP, CVP and HR reflect hemodynamical stability, 60 mmHg (IQR, 53 – 65 mmHg), 8 mmHg (IQR, 6 – 11 mmHg) and 51 b/min (IQR, 45 – 60 b/min), respectively.
